# Supplementary material
Source: PubMed Central journal article supplement (PMC3580278)
Supplement: ismej2012126x1.pdf [file ismej2012126x1.pdf]

# Supplementary Material

## Comparable SAR11 and *Prochlorococcus* light enhanced uptake in the North Atlantic subtropical gyre

Paola R. Gómez-Pereira<sup>1</sup>, Manuela Hartmann<sup>1</sup>, Carolina Grob<sup>2</sup>, Glen A. Tarran<sup>3</sup>, Adrian P. Martin<sup>1</sup>, Bernhard M. Fuchs<sup>4</sup>, David J. Scanlan<sup>2</sup> and Mikhail V. Zubkov<sup>1\*</sup>

<sup>1</sup>National Oceanography Centre, Ocean Biogeochemistry & Ecosystems Research Group, European Way, Southampton, SO14 3ZH, United Kingdom

<sup>2</sup>School of Life Sciences, University of Warwick, Gibbet Hill Road, Coventry, CV4 7AL, United Kingdom

<sup>3</sup>Plymouth Marine Laboratory, Prospect Place, The Hoe, Plymouth, PL1 3DH, United Kingdom

<sup>4</sup>Max Planck Institute for Marine Microbiology, Bremen, D-2859, Germany.

\*Correspondence: M. V. Zubkov. Email: mvz@noc.ac.uk

**Supplementary Table 1: Oligonucleotide probes used in this study**

| Probe name       | Target organism        | Sequence 5' ->3'                | Position | FA % | Reference                                              |
|------------------|------------------------|---------------------------------|----------|------|--------------------------------------------------------|
| EUB338*          | <i>Bacteria</i>        | GCTGCCTCCCGTAGGAGT              | 338      | 35   | Amann et al. 1990                                      |
| EUB338-II*       | Supplement to EUB338   | GCAGCCACCCGTAGGTGT              | 338      | 35   | Daims et al. 1999                                      |
| EUB338-III*      | Supplement to EUB338   | GCTGCCACCCGTAGGTGT              | 338      | 35   | Daims et al. 1999                                      |
| PRO405           | <i>Prochlorococcus</i> | AGAGGCCTTCGTCCCTCA              | 405      | 40   | West et al. 2010                                       |
| SAR11-152R **    | SAR11                  | TTAGCACAAAGTTCCYCGTGT           | 152      | 25   | Morris et al. 2002                                     |
| SAR11-441R **    | SAR11                  | TACAGTCATTTTCTTCCCCGAC          | 441      | 25   | Morris et al. 2002                                     |
| SAR11-441Rmod ** | SAR11                  | TAC <u>C</u> GTCATTTTCTTCCCCGAC | 441      | 25   | Morris et al., 2002. Modified, this study <sup>+</sup> |
| SAR11-542R **    | SAR11                  | TCCGAACTACGCTAGGTC              | 542      | 25   | Morris et al. 2002                                     |
| SAR11-732R **    | SAR11                  | GTCAGTAATGATCCAGAAAGYTG         | 732      | 25   | Morris et al. 2002                                     |
| SAR11-487 **     | SAR11                  | CGGACCTTCTTATTCGGG              | 487      | 25   | This study                                             |
| SAR11-487-h3 **  | SAR11                  | CGGCTGCTGGCACGAAGTTAGC          | 505      | 25   | This study                                             |

**Footnote:**

Abbreviations: h, unlabelled helper oligonucleotide probe; FA, formamide concentration (v/v) in hybridization buffer

- Position in 16S rRNA according to *E. coli* numbering

\* , \*\* probes applied together

<sup>+</sup> SAR11-Rmod has a one-base modification (shown underlined) from SAR11-441R to account variance in SAR11 clade sequences.

**References**

Amann RI, Binder BJ, Olson RJ, Chisholm SW, Devereux R, Stahl DA (1990). Combination of 16s ribosomal-Rna-targeted oligonucleotide probes with flow-cytometry for analyzing mixed microbial-populations. *Appl Environ Microb* **56**: 1919-1925.

Daims H, Bruhl A, Amann R, Schleifer KH, Wagner M (1999). The domain-specific probe EUB338 is insufficient for the detection of all Bacteria: Development and evaluation of a more comprehensive probe set. *Syst Appl Microbiol* **22**: 434-444.

Morris RM, Rappe MS, Connon SA, Vergin KL, Siebold WA, Carlson CA *et al* (2002). SAR11 clade dominates ocean surface bacterioplankton communities. *Nature* **420**: 806-810.

West NJ, Schonhuber WA, Fuller NJ, Amann RI, Rippka R, Post AF *et al* (2001). Closely related *Prochlorococcus* genotypes show remarkably different depth distributions in two oceanic regions as revealed by *in situ* hybridization using 16S rRNA-targeted oligonucleotides. *Microbiology* **147**: 1731-1744.

## Legends to figures

**Supplementary Figure 1:** (a, b) Characteristic flow cytometric density plot signatures of SYBR Green – DNA stained bacterioplankton and (c, d) Flow-sorted groups of LNA containing cells, *Prochlorococcus* cells and *Synechococcus* cells, and singlet reference beads. Axis represents SYBR Green I DNA-stained green fluorescence, and (a, c) 90° light scatter or (c, d) phycoerythrin orange auto-fluorescence characteristic of *Synechococcus*.

**Supplementary Figure 2:** Time course total microbial uptake of <sup>3</sup>H-ATP in the light (white symbols) and in the dark (dark grey symbols) in different experiments as shown in Figure 1. Same symbols represent paired light and dark experiments.

**Supplementary Figure 3:** Scatter plot comparison of (a) total <sup>33</sup>P-ATP and (b) total methionine microbial uptake retained in particulate material (total) versus flow sorted bacterioplankton (Bpl) uptake. No statistically significant difference was detected between measurements for both substrates. ATP: t-test p=0.55, methionine t-test p=0.17, f-statistic higher than f-critical for both substrates. Scatter plot comparison of (c) <sup>33</sup>P-ATP and (d) methionine total bacterioplankton (Bpl) uptake versus sum of *Prochlorococcus* (Pro) and SAR11 uptake. Total group uptake was calculated as the uptake of an average flow-sorted cell by the abundance of the group in the corresponding experiment.

**Supplementary Figure 4:** Bioassay estimation of ATP ambient concentration and uptake rate with <sup>3</sup>H-ATP and <sup>33</sup>P-ATP showing relationship between added ATP concentration and uptake time.

**Supplementary Figure 5:** Scatter plot comparison of (a) <sup>33</sup>P-ATP and (b) methionine uptake in dark versus light incubations of high-nucleic acid containing bacterioplankton (HNA-ls) estimated by subtracting the sum of *Prochlorococcus* and SAR11 population uptake from the total microbial uptake. Paired t-test for both substrates p>0.05.

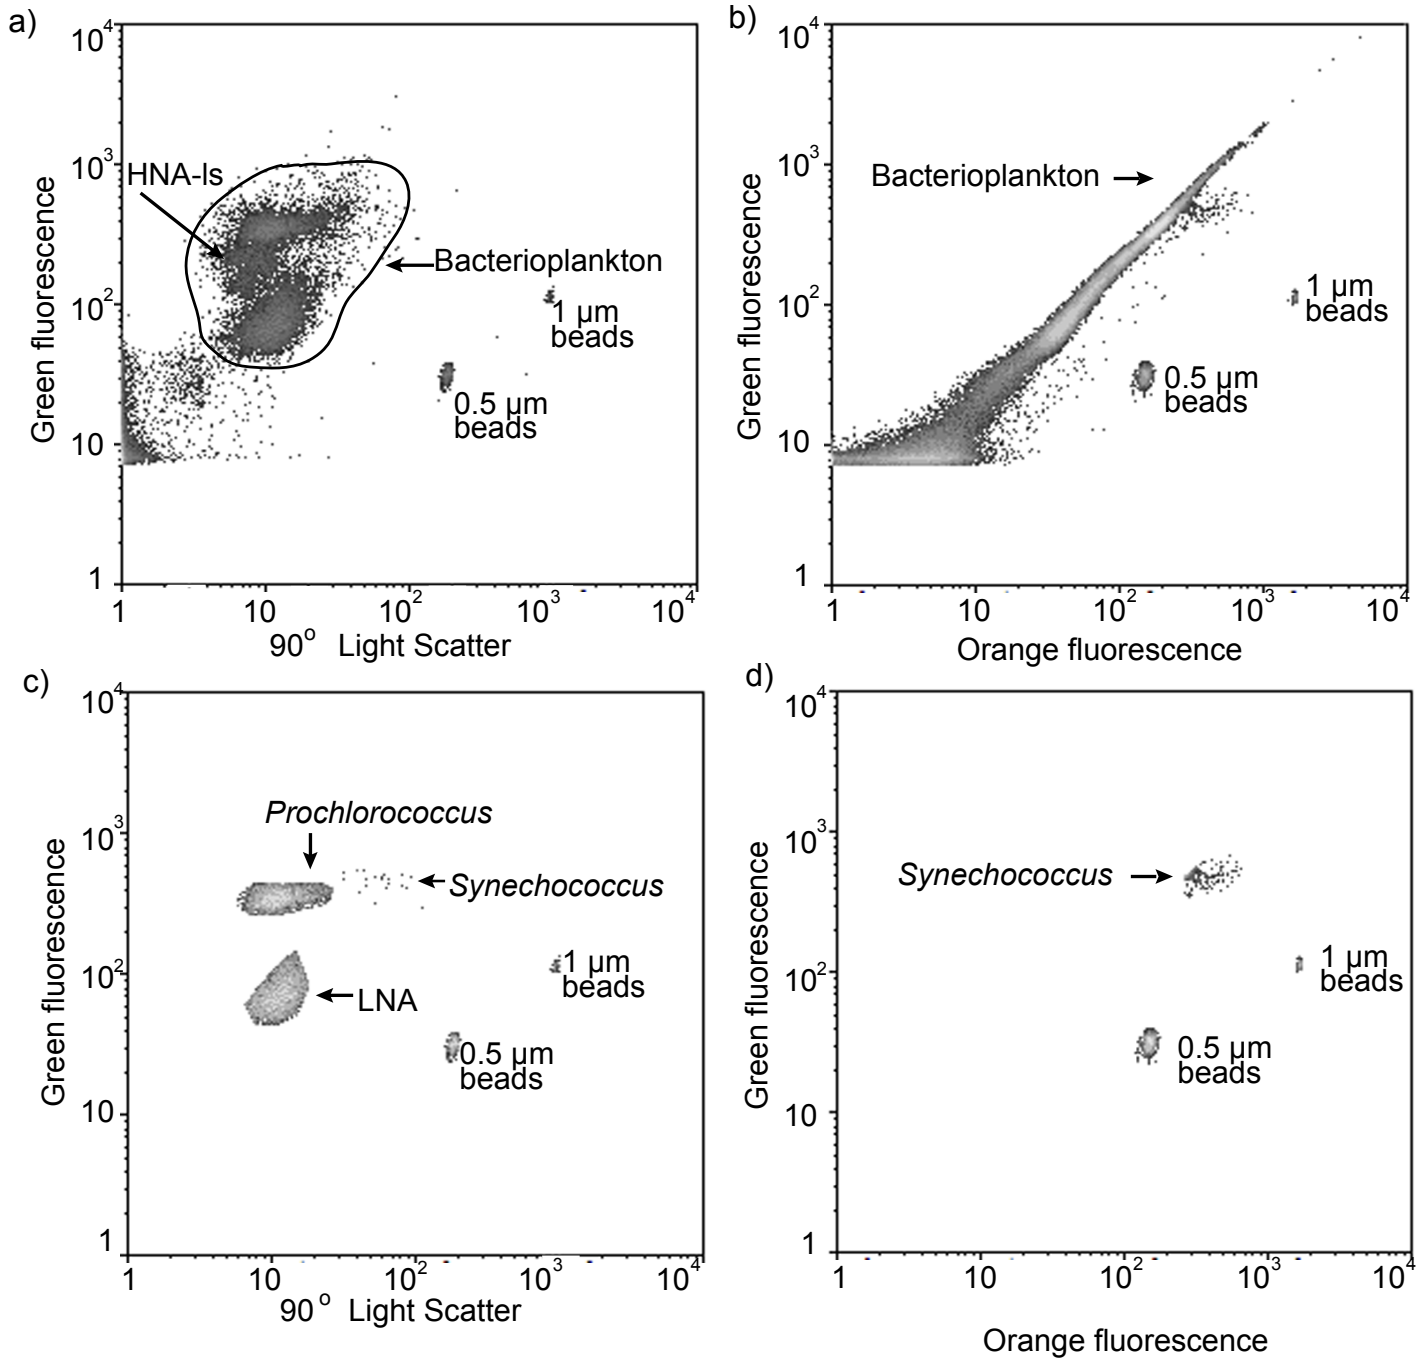

Supplementary Figure 1

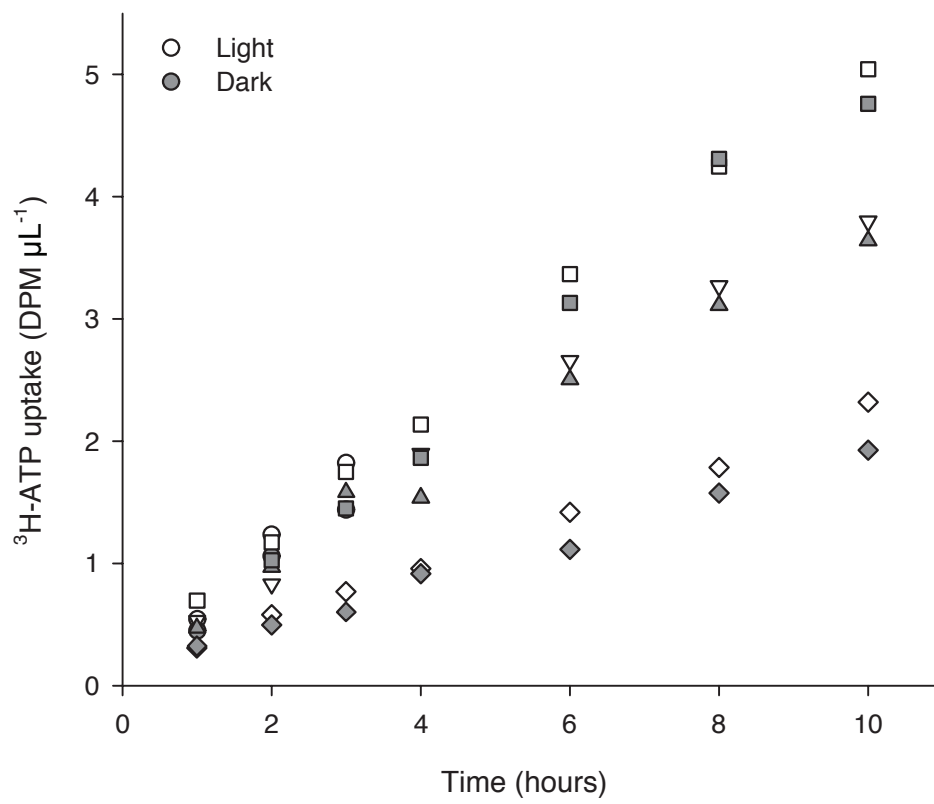

Supplementary Figure 2

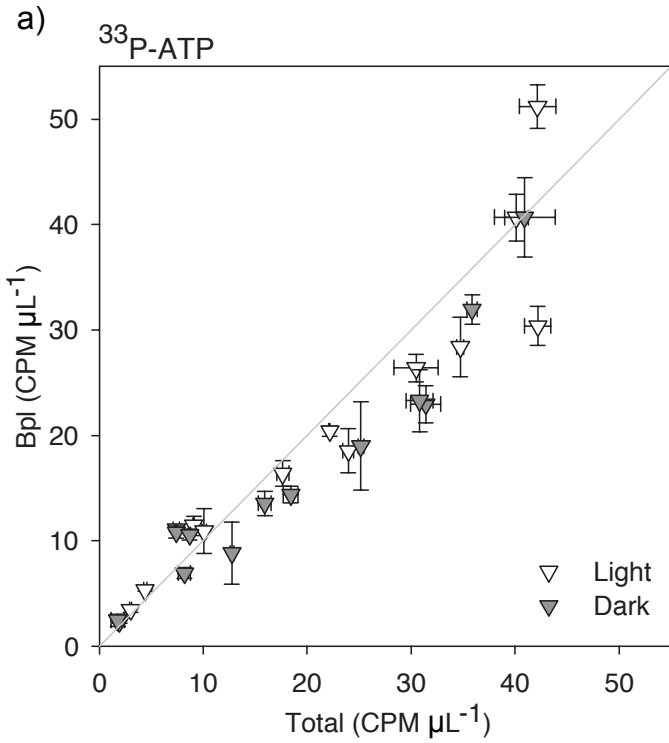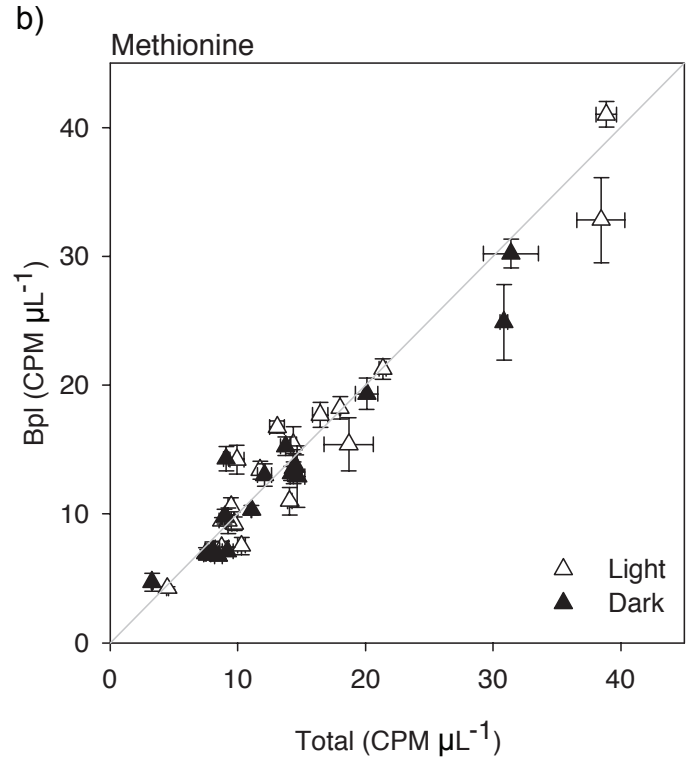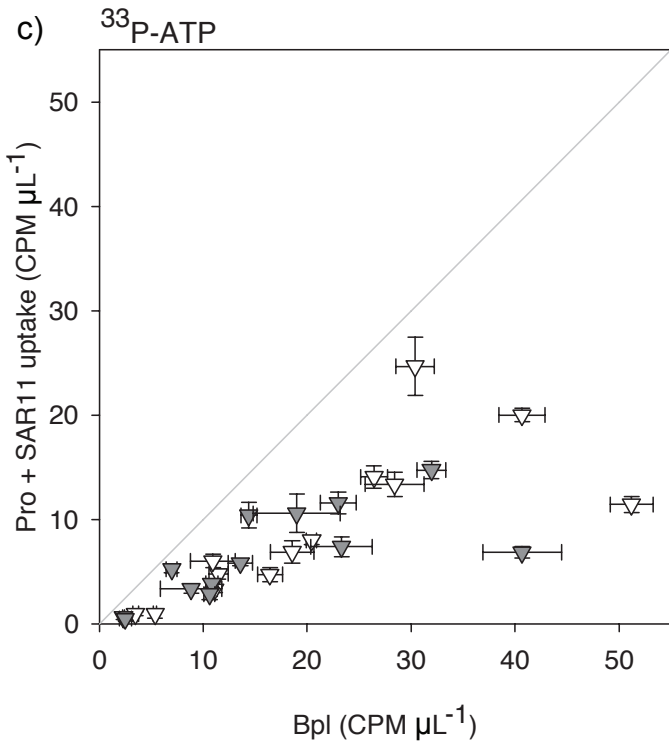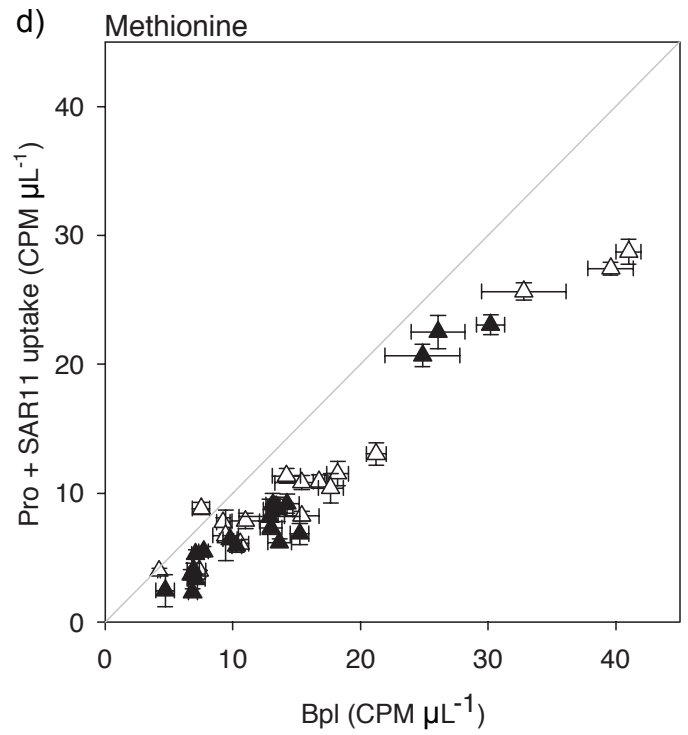

Supplementary Figure 3

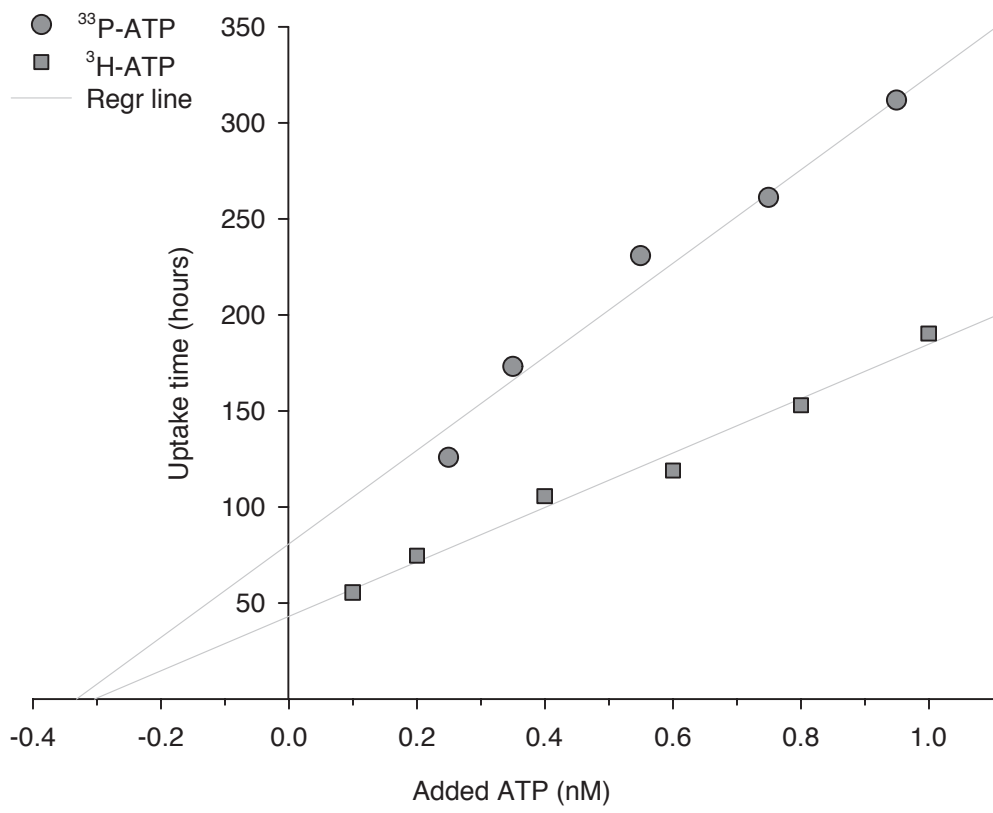

Supplementary Figure 4

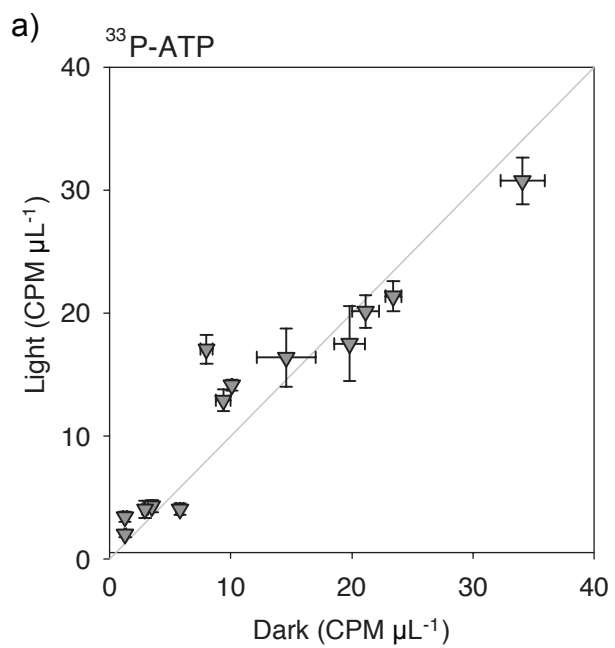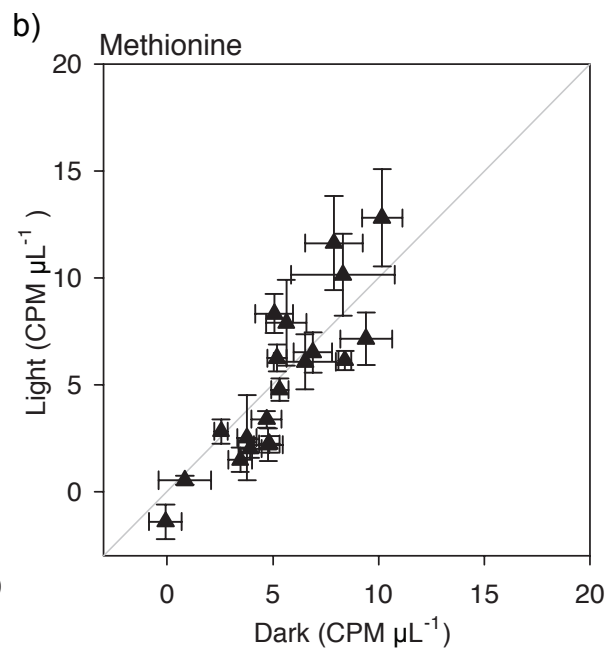

Supplementary Figure 5
